# Supplementary material for: Improving analytical methods for protein-protein interaction through implementation of chemically inducible dimerization
Source: PubMed Central journal article supplement (PMC4901268; doi:10.1038/srep27766), 2016-06-10
Supplement: srep27766-s1.pdf [file srep27766-s1.pdf]

## **Supplementary material**

# **Improving analytical methods for protein-protein interaction through implementation of chemically inducible dimerization**

### **Authors and affiliations**

Tonni Grube Andersen<sup>1,\*‡</sup>, Sebastian J. Nintemann<sup>1</sup>, Magdalena Marek<sup>2,#</sup>, Barbara A. Halkier<sup>1</sup>, Alexander Schulz<sup>1</sup> and Meike Burow<sup>1</sup>

<sup>1</sup>Center for Dynamic Molecular Interactions (DynaMo), Department of Plant and Environmental Sciences, University of Copenhagen, Thorvaldsensvej 40, 1871 Frederiksberg C, Denmark

<sup>2</sup>Department of Plant and Environmental Sciences, Faculty of Science, University of Copenhagen, Thorvaldsensvej 40, 1871 Frederiksberg C, Denmark

\*Current address: Department of Plant Molecular Biology, University of Lausanne, Biophore building, 1015 Lausanne, Switzerland

#Current address: Department of fundamental Microbiology, University of Lausanne, Biophore building, 1015 Lausanne, Switzerland

‡To whom correspondence should be addressed: [tonnigrube.andersen@unil.ch](mailto:tonnigrube.andersen@unil.ch)

# Supplementary figure 1

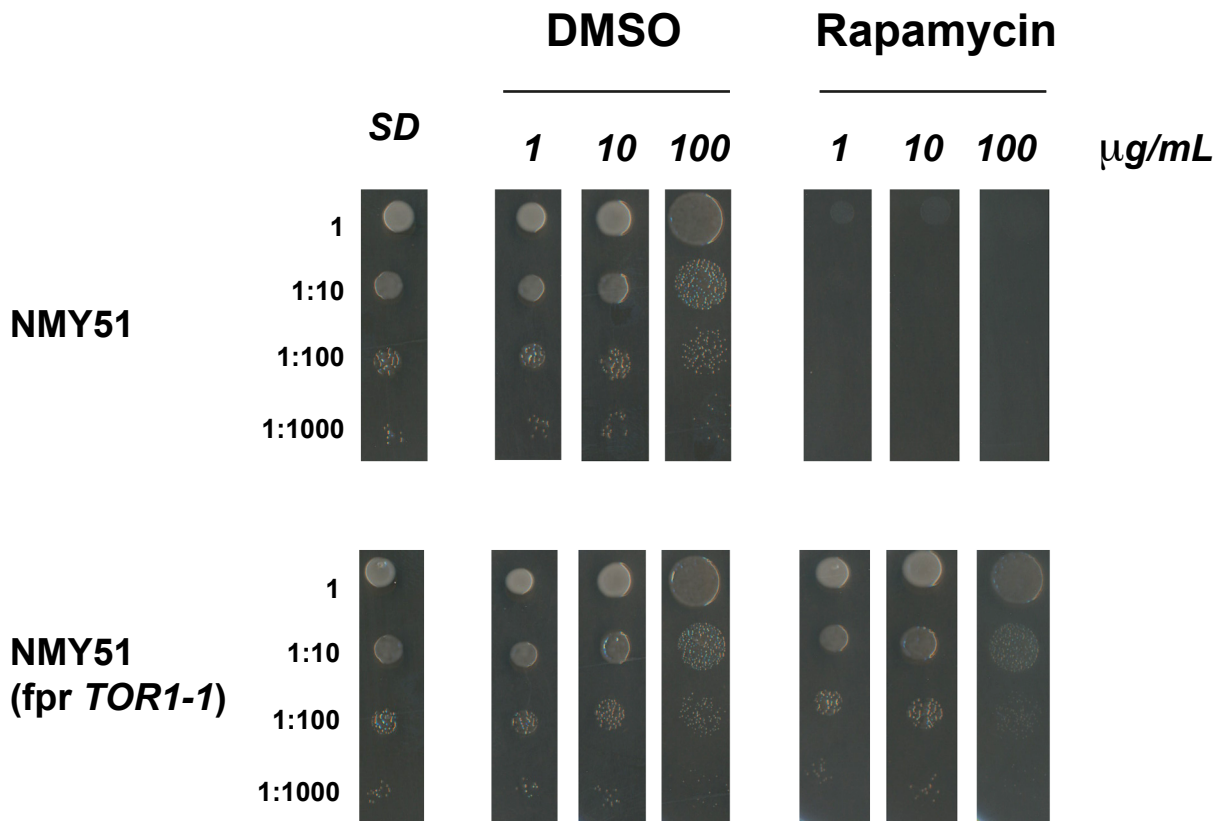

Supplementary Figure 1 Generation of NMY51  $\Delta\text{fpr}$  TOR1-1 yeast line  
The original NMY51 strain as well as the version containing the  $\Delta\text{fpr}$  and TOR1-1 mutations were evaluated on media containing a concentration gradient of either DMSO or rapamycin dissolved in DMSO.

## Supplementary figure 2

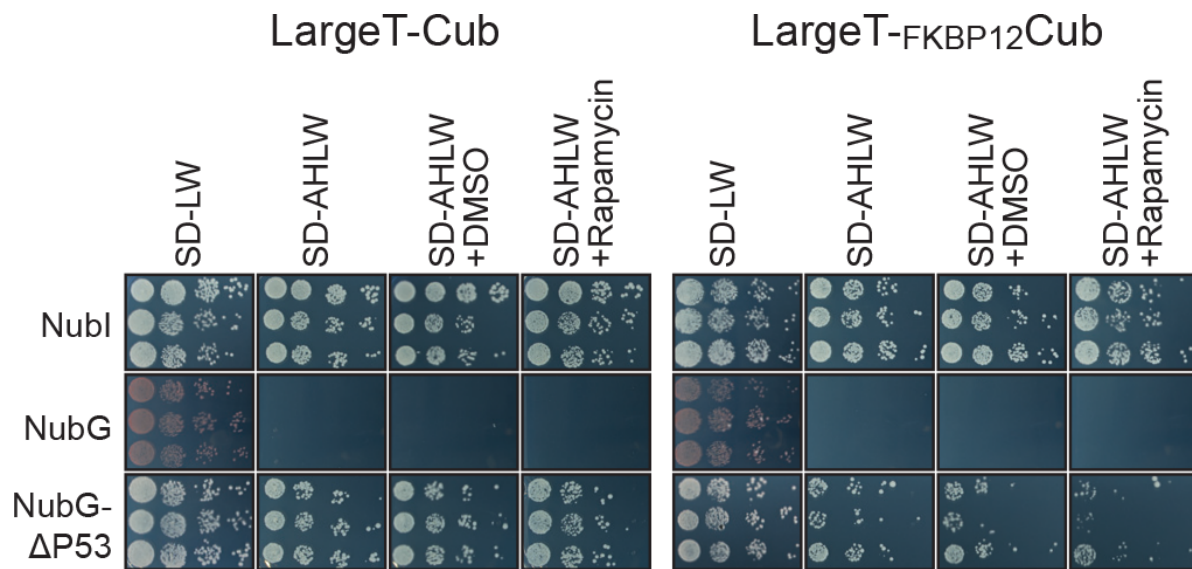

Supplementary Figure 2 yeast reporters alone and under different conditions

Growth of the rapamycin resistant yeast strain expressing LargeT bait construct with or without incorporated FKBP12 was tested against a positive control (Nubl) or preys without the FRB domain present.

# Supplementary figure 3

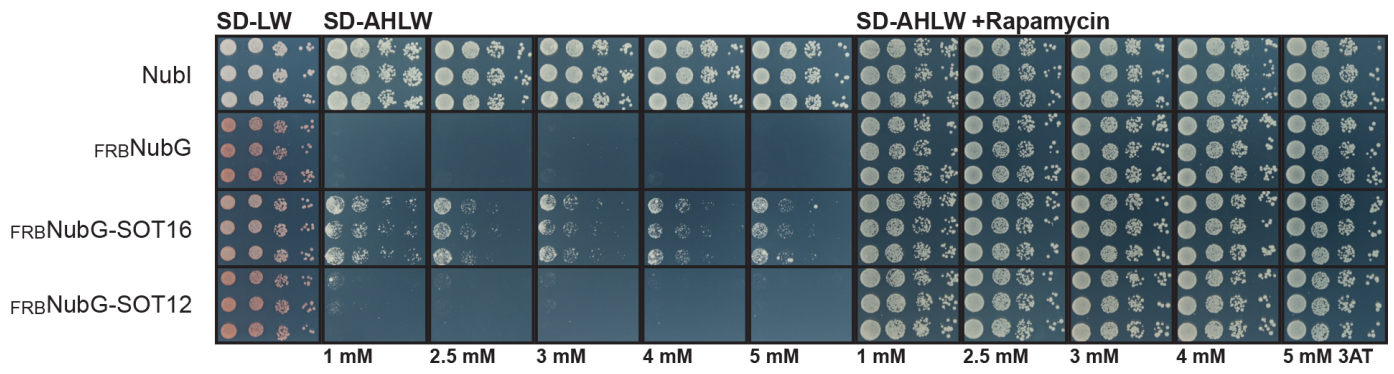

## Supplementary Figure 3 UGT SOT different conditions

The interaction between the FKBP12-UGT74B1 bait and different preys was assessed under different conditions.

## Supplementary figure 4

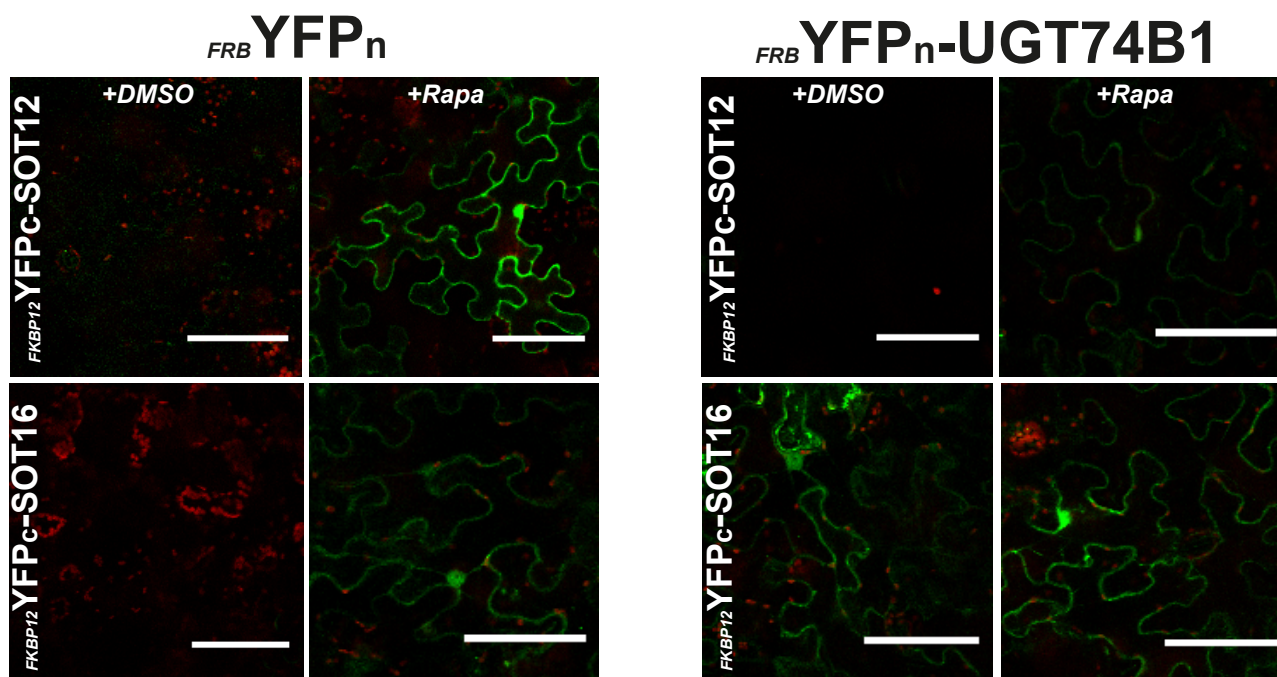

### Supplementary Figure 4 N-tagged BiFC analysis

Investigation of interactions of either FRB-YFP<sub>n</sub> or FRB-YFP<sub>n</sub>-UGT74B1 against FKBP12-YFP<sub>c</sub> or the N-terminally tagged proteins FKBP12-YFP<sub>c</sub>-SOT12 or FKBP12-YFP<sub>c</sub>-SOT16. Tobacco leaves were either infiltrated with water containing DMSO (+ DMSO) or 30 μM rapamycin (+ Rapa). Scale bars represent 50 μm

## Supplementary table 1

### Construction of tobacco vectors

| Number | Name             | Sequence (5' to 3')                                                          |
|--------|------------------|------------------------------------------------------------------------------|
| 1      | USER-FP forward  | GGCTTAAUATGGTGAGCAAGGGCGAGGAGC                                               |
| 2      | L1 FP R          | ACCAGCACCUGAATTCGCAGATCCTTGTACAGCTCGTCCATG                                   |
| 3      | L1 FRB F         | AGGTGCTGGUGCTGGTGCTGGTCTATCCTATCTAGAATCCTCTGGCATGAGATGTG                     |
| 4      | USER- L2 R       | GGTTAAUGCTGAGGTTAATTAAGCCTCTCAGCGGTGGCGACCGGTGCG                             |
| 5      | USER L1 FRB F    | GGCTTAAUGCTGAGAGGCTTAATTAACCTCAGCGCTCGAGGCGCAGCAGGGCGGGGAGTGCAAGTGGAAACC     |
| 6      | FP R             | GGTTAAUTCAGTACAGCTCGTCCATGCCGAGAGTGATCCCC                                    |
| 7      | USER L3 FKBP12 R | GGTTAAUGCTGAGGTTAATTAAGCCTCTCAGCCCGGTACCCTGC                                 |
| 8      | USER L3 F        | GGTTAAUGCTGAGAGGCTTAATTAACCTCAGCGCTCGAGGCGCAGCAGGGCGGGGAGTGCAAGTGGAAACCATCTC |
| 9      | FP FKBP12 R      | AGAAGCUCCACATCGAAGACGAGAGTGGCATGTGGTGGG                                      |
| 10     | FKBP FP F        | AGCTTCUAAAACCTGAAATGGTGAGCAAGGGCGAGG                                         |
| 11     | Yc R             | GGTTAAUUCTGTACAGCTCGTCCATGCC                                                 |
| 12     | Yc F             | GGTTAAUCAGCTCGCCGACCACTACCAGCAGA ACACC                                       |
| 13     | FRB-Yn R         | ACCAGCACCUGAACAGCTCCTCGCCCTTGCTCACcat                                        |
| 14     | FKBP Yc F        | AGCTTCUCAGCTCGCCGACCACTACCAGCAGA ACACC                                       |
| 15     | Yn-FRB R         | AGAAGCUGAATTTCGCAGATCCTTGTACAGCTCGTCCATG                                     |
| 16     | FRB-Yn F         | AGGTGCTGGUATGGTGAGCAAGGGCGAGGAGC                                             |
| 17     | Yn R             | GGTTAAUGAACAGCTCCTCGCCCTTGCTCACcat                                           |

### Construction of yeast vectors

| Number | Name               | sequence                                                  |
|--------|--------------------|-----------------------------------------------------------|
| 18     | USER-NcoI-Lnk-FKBP | ACCACCGCCACCCTCCAGTTTTAGAAGCTCCACATCG                     |
| 19     | FKBP12-FUS-R       | AGGTGGCGGTGGUTCTGGTGGCGGTGGTCTATGTCGGGGGGGATCCCTCC        |
| 20     | FUS-Cub-F          | GGTTAAUUCATGCGGGCCGCAAGCTGATC                             |
| 21     | USER-Cub-NotI-R    | GGCTTAAUATGATCATATGGCATGCATGTGC                           |
| 22     | USER-NdeI-NubG-F   | ACCGCCACCAGCGUAATCTGGAACATCGTATGG                         |
| 23     | FUS-NubG-R         | ACGCTGGTGGCGGUGTCTGGTGGCGGTGGTCTATCCTCTGGCATGAGATGTGGCATG |
| 24     | FUS-Lnk-FRB-F      | GGTTAAUGGATCCGGTGGCGACCGGTGCCGTAGTC                       |

### Cloning of Genes

| Number                     | Name          | sequence                              |
|----------------------------|---------------|---------------------------------------|
| <b>UGT74B1 (At1g24100)</b> |               |                                       |
| 25                         | user ugt f    | GGCTTAAU ATGGCGGAAA CAACTCCCAA AGTG   |
| 26                         | UGT74B1-Sfi-F | ATTGAGGCCATTACGGCCATGGCGGAAACAACCTCCC |
| 27                         | user ugt r    | GGCTTAAU TTACTTCCCTAAACTCTCTATAAACTCG |
| 28                         | user ugt ns r | GGCTTAAU CTTCCCTAAACTCTCTATAAACTCG    |
| 29                         | UGT74B1-Sfi-R | TCAATGGCCGAGGCGGCCTTCTTCCCTAAACTCTC   |

#### SOT12 (At2g03760)

|    |                  |                                               |
|----|------------------|-----------------------------------------------|
| 30 | user 12 f        | GGCTTAAU TGTCATCAT CATCATCAGT TCCTGC          |
| 31 | SOT12-Sfi-F      | ATTGAGGCCATTACGGCCATGTCATCATCATCAGTTCCTGC     |
| 32 | user 12 r        | GGCTTAAU TCAAGAAGAAAATTTAAGACCAGAACC          |
| 33 | user 12 ns r     | GGCTTAAUAGAAGAAAATTTAAGACCAGAACC              |
| 34 | SOT12-Sfi-R-stop | TCAATGGCCGAGGCGGCCTCAAGAAGAAAATTTAAGACCAGAACC |

#### SOT16 (At1g74100)

|    |                  |                                           |
|----|------------------|-------------------------------------------|
| 35 | user 16 f        | GGCTTAAUATGGAATCAA AGACAACCCA AAACGG      |
| 36 | SOT16-Sfi-F      | ATTGAGGCCATTACGGCCATGGAATCAAAGACAACCC     |
| 37 | user 16 r        | GGCTTAAU TCAGTTATCATGTTGAAGCAAGCC         |
| 38 | user 16ns r      | GGCTTAAUGTTATCATGTTGAAGCAAGCC             |
| 39 | SOT16-Sfi-R-stop | TCAATGGCCGAGGCGGCCTCAGTTATCATGTTGAAGCAAGC |

#### ΔP53

|    |                  |                                     |
|----|------------------|-------------------------------------|
| 40 | dP53-Sfi-F-start | AGAGTGGCCATTACGGCCATGG              |
| 41 | dP53-Sfi-R-stop  | CGAGAGGCCGAGGCGGCCTCAGTCTGAGTCAGGCC |

#### Large T

|    |            |                        |
|----|------------|------------------------|
| 42 | Sfi-stop-F | CGGCCTAATAGCTAGGCCGCCT |
| 43 | Sfi-stop-R | CGGCCTAGCTATTAGGCCGTAA |

Cloned into USER cassette of pCambia 1300

|           |                     |              |                     |
|-----------|---------------------|--------------|---------------------|
| 1+2 (A)   | FP                  | FRET vectors |                     |
| 3+4 (B)   | FRB-USER            | A+B          | TQ-FRB-USER         |
| 5+6 (C)   | USER - FRB - TQ     | C            | USER -FRB -TQ       |
| 1+7 (D)   | Venus FKBP12 - USER | D            | Venus-FKBP12 - USER |
| 8 + 9 (E) | USER - FKBP12       | E+F          | USER - FKBP12-Venus |
| 10 +6 (F) | FKBP12 - Venus      | BiFC vectors |                     |
| 1+13 (G)  | Yn                  | G+H          | Yn FRB - USER       |
| 3+4 (H)   | FRB - USER          | I +J         | USER - FRB Yn       |
| 5+15 (I)  | USER - FRB          | K            | Yc FKBP12 - USER    |
| 16+17 (J) | Yn                  | L+M          | USER - FKBP12 Yc    |
| 12+7 (K)  | Yc FKBP12 - USER    |              |                     |
| 8+9 (L)   | USER - FKBP12       |              |                     |
| 14+11 (M) | Yc                  |              |                     |
